# Supplementary material for: Phylogenomic and Evolutionary Analyses Reveal Diversifications of SET-Domain Proteins in Fungi
Source: MDPI journal article supplement (doi:10.3390/jof8111159), 2022-11-02
Supplement: s1 [file s1]

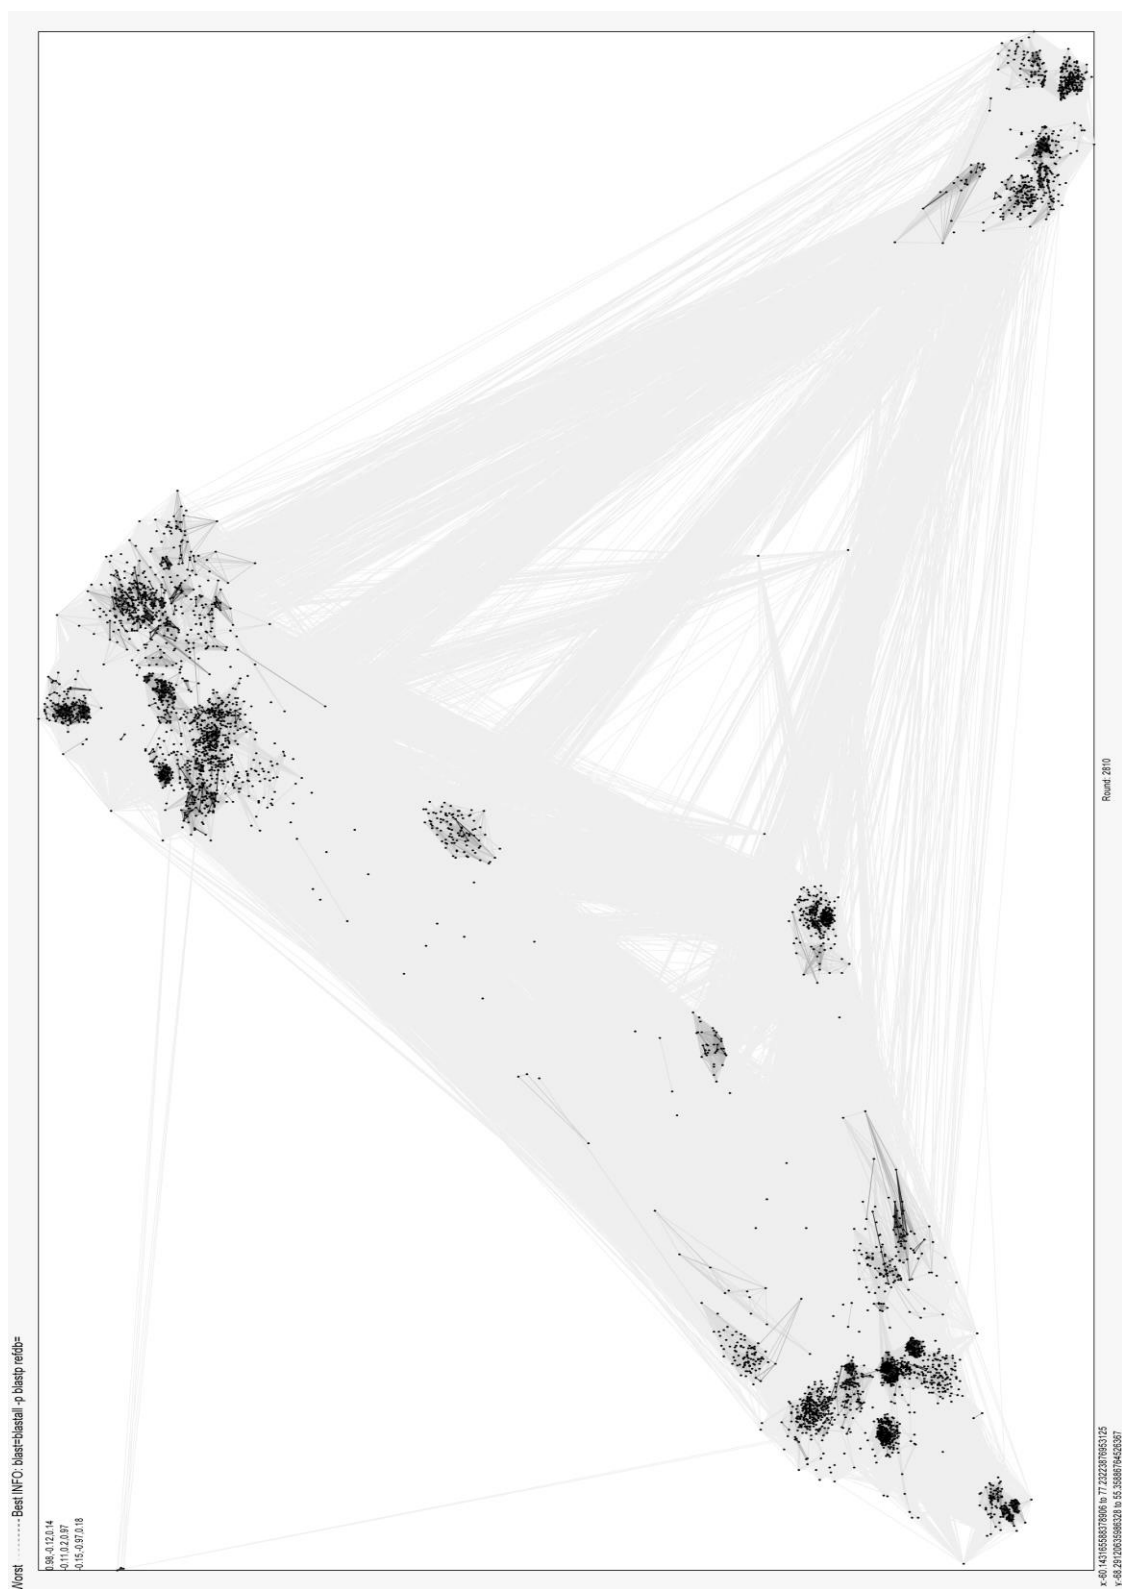

**Figure S1.** CLANS clustering of 4171 SET domain sequences obtained from 229 whole genome sequenced fungal species. A Java-based software program, CLANS, was used to elucidate the relationships between and within subfamilies of the putative 4172 SET domain sequences from 229 fungal genomes.

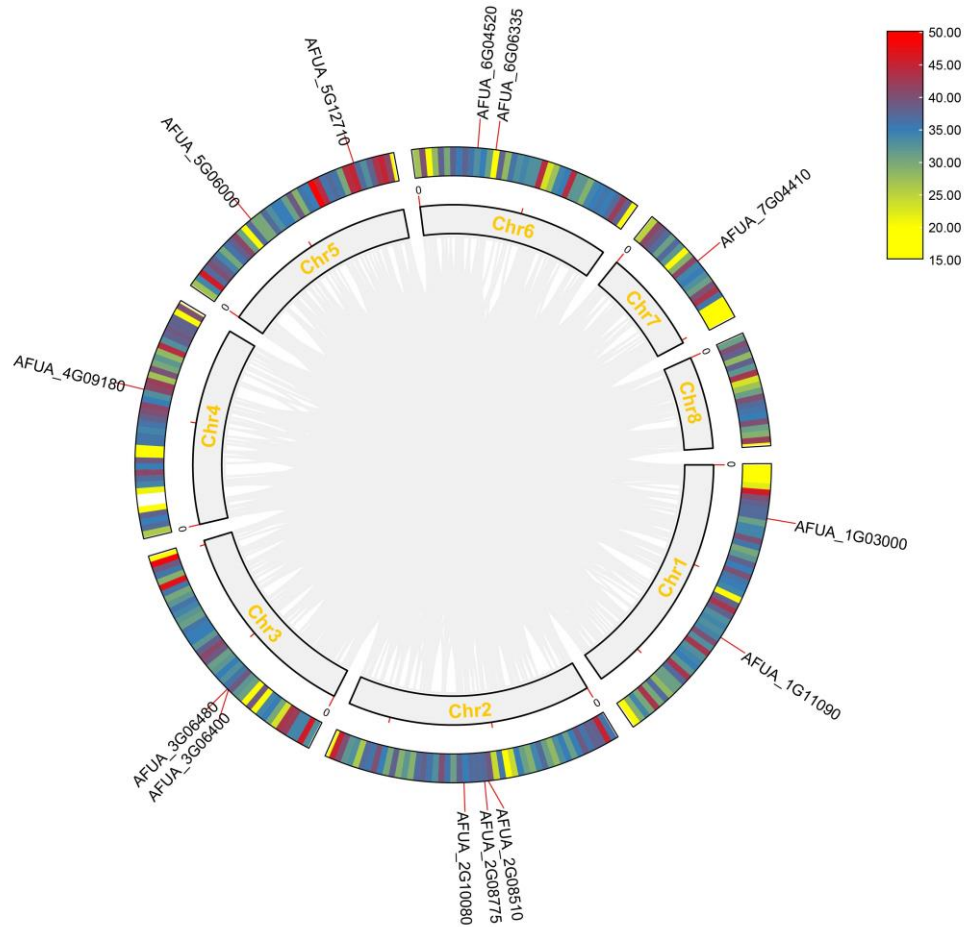

**Figure S2.** Chromosomal distribution of the SET-domain containing genes in *A. fumigatus* genome. 13 SET-domain genes are unevenly distributed on the 8 chromosomes of *A. fumigatus* genome, and the number of genes on each chromosome is irrelevant to chromosome size.

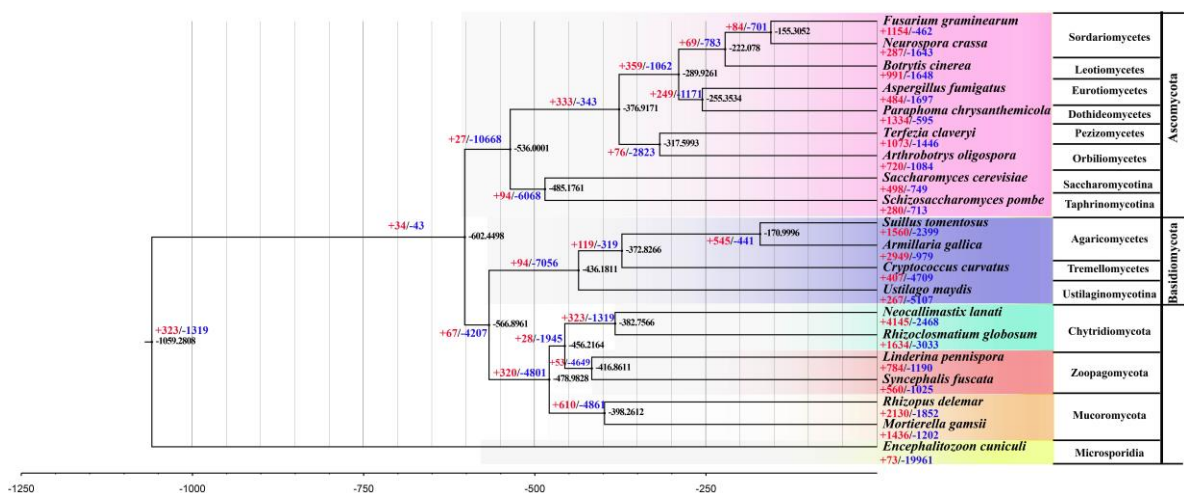

**Figure S3.** Various expansions and contractions among the fungal lineages using CAFE analysis. The numbers present on each node correspond to the expansion and contraction numbers of orthologues genes predicted by CAFE.
