# Supplementary material for: Phylogenomic and Evolutionary Analyses Reveal Diversifications of SET-Domain Proteins in Fungi
Source: J Fungi (Basel). 2022 Nov 2;8(11):1159. doi: 10.3390/jof8111159 (PMC9692433; doi:10.3390/jof8111159)
Supplement: Supplementary file 1 [file jof-08-01159-s001.zip › Table S1-revised.xlsx]

## Sheet: Sheet1
Table S1: Distribution of SET domain genes in 229 fungal organisms
									Group 1	Group 2	Group 3	Group 4	Group 5	Group 6	Group 7	Group 8	Group 9	Group 10	Group 11	Group 12	Group 13	Group 14	Group 15	Group 16	Group 17	Group 18	Group 19	Group 20	Group 21	Group 22	Group 23	Group 24	Group 25	Group 26	Group 27
Taxonomy	Species	Genome size	Contig number	N50	Genome coverage	Published	4172	3816	136	116	160	233	267	223	31	35	102	85	58	215	195	179	22	34	87	79	98	172	541	13	117	67	88	80	383
Ascomycota/Pezizomycotina/Dothideomycetes	Aaosphaeria arxii	38.9	176	449405	86.5x	Haridas S et al., 2020	29	28	1	1	1	1	1	1	1					1	2	1		1			1	3	8		1			1	2
Ascomycota/Pezizomycotina/Dothideomycetes	Cochliobolus carbonum	31.27	879	105171	200x	Condon BJ et al., 2013	26	26	1	1	1	1	1	1	1		1			1	1	2					1	3	7		1			1	1
Ascomycota/Pezizomycotina/Dothideomycetes	Cucurbitaria berberidis	32.91	184	639821	145.7x	Haridas S et al., 2020	32	29	1	1	1	1	1	1			1			1	1	2					1	2	12		1			1	1
Ascomycota/Pezizomycotina/Dothideomycetes	Didymella exigua	34.39	1010	145421	82.1x	Haridas S et al., 2020	24	21	1		1	1	1	1	1		1			1	1	2					1		5		2			1	1
Ascomycota/Pezizomycotina/Dothideomycetes	Leptosphaeria maculans	44.89	1578	60880	8.31x	Rouxel T et al., 2011	23	22		1	1	1	1	1	1		1			1	1	2			1		1	1	5		1			1	1
Ascomycota/Pezizomycotina/Dothideomycetes	Paraphoma chrysanthemicola	40.66	34	1781809	199.2x	Mesny F et al., 2021	32	31	1	1	1	1	1	1	1		1			2	1	2					1	2	11		2			1	1
Ascomycota/Pezizomycotina/Dothideomycetes	Phaeosphaeria poagena	34.08	26	unknown	117.16x	Mesny F et al., 2021	32	29	1	1	1	1	1	1	1		1	1		1	1	2						3	10		1			1	1
Ascomycota/Pezizomycotina/Dothideomycetes	Pyrenophora tritici-repentis	38	705	115530	unknown	Manning VA et al., 2013	24	11	1		1		1	1				1		1	1	1							2						1
Ascomycota/Pezizomycotina/Dothideomycetes	Sporormia fimetaria	25.89	293	249100	104x	Haridas S et al., 2020	19	18	1		1	1		1						1	1	1					1	2	4		2			1	1
Ascomycota/Pezizomycotina/Eurotiomycetes	Aspergillus niger	34.85	24	unknown	8.9x	Andersen MR et al., 2011	17	16	1		1	1	1	1				1		1	2	1						2		1				2	1
Ascomycota/Pezizomycotina/Eurotiomycetes	Aspergillus nidulans	30.48	82	282268	unknown	Arnaud MB et al., 2012	18	17	1		1	1	1	1	1			1		1	2	1						1	1		1			2	1
Ascomycota/Pezizomycotina/Eurotiomycetes	Blastomyces dermatitidis	75.35	1791	276930	8.45x	Muñoz JF et al., 2015	18	15			1	1	1	1				1		2	2	2							2		1				1
Ascomycota/Pezizomycotina/Eurotiomycetes	Paecilomyces niveus	36.02	586	185295	104x	Biango-Daniels MN et al., 2018	13	12	1		1	1	1	1						1	1	1						1	1	1					1
Ascomycota/Pezizomycotina/Eurotiomycetes	Cladophialophora bantiana	36.72	140	607153	unknown	Teixeira MM et al., 2017	21	20	1	1	1	1	1	1	1		1			1	1	1	1				1		5						2
Ascomycota/Pezizomycotina/Eurotiomycetes	Coccidioides immitis	28.95	10	4311478	14.4x	Sharpton TJ et al., 2009	17	17	1		1	1	1	1	1			1		1	2	1							3	1	1				1
Ascomycota/Pezizomycotina/Eurotiomycetes	Cyphellophora europaea	28.78	74	585176	unknown	Teixeira MM et al., 2017	21	16	1	1	1	1	1	1	1		1			1	1	1	1						2					1	1
Ascomycota/Pezizomycotina/Eurotiomycetes	Endocarpon pallidulum Enpa	41.44	13340	unknown	unknown	McDonald TR et al., 2013	12	11	1	1	1	1	1	1						1		1						1	1						1
Ascomycota/Pezizomycotina/Eurotiomycetes	Endocarpon pusillum	37.13	1604	66439	unknown	Wang YY et al., 2014	13	10	1	1	1	1	1	1						1		1						1							1
Ascomycota/Pezizomycotina/Eurotiomycetes	Exophiala aquamarina	41.57	596	528423	unknown	Teixeira MM et al., 2017	24	22	1	1	1	1	1	1	2		1			1	1	1	1				1	1	4		2				1
Ascomycota/Pezizomycotina/Eurotiomycetes	Exophiala oligosperma	38.22	287	973116	unknown	Teixeira MM et al., 2017	29	21	1	1	1	1	1	1	2					1	1	1	3				1		3		1			1	1
Ascomycota/Pezizomycotina/Eurotiomycetes	Fonsecaea nubica	33.79	259	302482	85.0x	Costa FF et al., 2016	21	19	1	1	1	1	1	1			1			1	1	1	1				1	1	4						2
Ascomycota/Pezizomycotina/Eurotiomycetes	Histoplasma capsulatum	32.99	2867	191715	7x	Sharpton TJ et al., 2009	11	10	1		1	1	1					1		1		1							2	1
Ascomycota/Pezizomycotina/Eurotiomycetes	Microsporum canis	23.24	309	135853	7.78x	Martinez DA et al., 2012	14	14	1		1	1	1	1				1		1		1		1				1	1	1	1				1
Ascomycota/Pezizomycotina/Eurotiomycetes	Paracoccidioides brasiliensis	29.06	552	123837	8.9x	Desjardins CA et al., 2011	11	8			1		1	1							1	1							2						1
Ascomycota/Pezizomycotina/Eurotiomycetes	Penicillium chrysogenum	31.34	299	4899068	21.97x	de Vries RP et al., 2017	17	14	1		1	1	1	1						2	1	1						2		1				1	1
Ascomycota/Pezizomycotina/Eurotiomycetes	Penicillium nordicum	30.84	1007	122793	unknown	Wingfield BD et al., 2015	15	14	1		1	1	1	1	1					1	1	1							1	1	1			1	1
Ascomycota/Pezizomycotina/Eurotiomycetes	Penicillium occitanis	36.25	1591	67126	unknown	Bravo-Ruiz G et al., 2017	14	14	1		1	1	1	1						1	1	1						1	3		1				1
Ascomycota/Pezizomycotina/Eurotiomycetes	Talaromyces atroroseus	30.86	130	376103	193x	Thrane U et al., 2017	11	11	1		1	1	1	1						1	1	1	1								1				1
Ascomycota/Pezizomycotina/Eurotiomycetes	Talaromyces marneffei	28.64	524	541514	8.8x	Nierman WC et al., 2015	12	12	1		1	1	1	1						1	1	1							2		1				1
Ascomycota/Pezizomycotina/Eurotiomycetes	Trichophyton equinum	24.16	1716	26788	unknown	Martinez DA et al., 2012	12	12	1			1	1	1				1		1		1						1	1	1	1				1
Ascomycota/Pezizomycotina/Eurotiomycetes	Trichophyton rubrum	22.5	622	85371	8.19x	Martinez DA et al., 2012	14	13	1		1	1	1	1				1		1		1						1	1	1	1				1
Ascomycota/Pezizomycotina/Eurotiomycetes	Uncinocarpus reesii	22.33	582	80843	5x	Sharpton TJ et al., 2009	17	17	1		1	1	1	1	1			1		1	1	1		1					3	1	1				1
Ascomycota/Pezizomycotina/Eurotiomycetes	Aspergillus fumigatus	29.385	19	2460113	unknown	Barber AE, et al.,2021	15	13			1	1	1	1	1					1	1	1						1	1	1	1				1
Ascomycota/Pezizomycotina/Lecanoromycetes	Acarospora strigata	26.83	2465	unknown	1.0x	McDonald TR et al., 2013	12	11	1	1	1	1	1	1						1	1	1									1				1
Ascomycota/Pezizomycotina/Lecanoromycetes	Cladonia grayi	34.62	519	unknown	15x	Armaleo D et al., 2019	18	18	1		1	1	1	1						1	1	1	1	1			1	1	4		1				1
Ascomycota/Pezizomycotina/Lecanoromycetes	Dibaeis baeomyces	35.27	2200	unknown	unknown	McDonald TR et al., 2013	18	18	1	1	1	1	1	1						1	1						1	1	1		6				1
Ascomycota/Pezizomycotina/Lecanoromycetes	Graphis scripta	36.22	2977	unknown	unknown	McDonald TR et al., 2013	16	16	1	1	1	1	1	1			1			1	1	1			1		1		3						1
Ascomycota/Pezizomycotina/Lecanoromycetes	Umbilicaria pustulata	39.23	5306	2288085	unknown	Dal Grande F et al., 2017	12	11	1	1	1	1	1	1						1	1	1						1							1
Ascomycota/Pezizomycotina/Leotiomycetes	Acephala macrosclerotiorum	73.68	1901	128081	141.3x	Miyauchi S et al., 2020	44	41		1	1	2	1	1	1		1			2	2	1						3	16		6				3
Ascomycota/Pezizomycotina/Leotiomycetes	Ascocoryne sarcoides	34.17	219	395555	38x	Gianoulis TA et al., 2012	31	30	1	1	1	1	1	1			1			1	1	1		1			1	3	10		3				2
Ascomycota/Pezizomycotina/Leotiomycetes	Botrytis cinerea	42.66	4534	2617329	unknown	Staats M et al., 2012	20	19		1		1	1	1			1			1	1		1				1	1	6		2				1
Ascomycota/Pezizomycotina/Leotiomycetes	Erysiphe pulchra	63.51	19442	11686	unknown	Wadl PA et al., 2019	11	11	1		1	1	1	1						1	1						1		1		1				1
Ascomycota/Pezizomycotina/Leotiomycetes	Glarea lozoyensis	39.51	239	327677	80x	Chen L et al., 2013	34	34		1	1	1	1	1	1		1			1	2	1		1			1	3	12		2				4
Ascomycota/Pezizomycotina/Leotiomycetes	Golovinomyces cichoracearum	146.84	821	4223	34.63x	Wu Y, et al., 2018	11	11	1		1	1	1	1						1	1								2		1				1
Ascomycota/Pezizomycotina/Leotiomycetes	Marssonina brunnea f. sp. multigermtubi MB_m1	51.95	2415	39371	34x	Zhu S et al., 2012	26	26	1	1	1	1	1	1	1		1			1	1	1					1	3	6		4				1
Ascomycota/Pezizomycotina/Leotiomycetes	Meliniomyces bicolor	82.38	301	1166752	190.6x	Martino E et al., 2018	37	33	1	1	1	1	1	1			1			3	1	1						3	13		2				3
Ascomycota/Pezizomycotina/Leotiomycetes	Meliniomyces variabilis	55.86	272	472131	108.4x	Martino E et al., 2018	36	32		1	1	1	1	1			1			1	1	1	1					2	11		5				4
Ascomycota/Pezizomycotina/Leotiomycetes	Oidiodendron maius	46.43	387	454872	28.70x	Kohler A et al., 2015	22	22		1	1	1	1	1			1			1	1	1					1	1	7		2				2
Ascomycota/Pezizomycotina/Leotiomycetes	Parauncinula polyspora	28.02	889	unknown	30x	Frantzeskakis et al., 2019	12	14	1		1	1	1	1			1			2	1	1	1				2								1
Ascomycota/Pezizomycotina/Leotiomycetes	Phialocephala scopiformis	48.88	302	372842	80.5x	Walker AK et al., 2016	41	38	1	1	1	1	1	1			1			1	1	1		2				3	12		5				6
Ascomycota/Pezizomycotina/Leotiomycetes	Pseudogymnoascus verrucosus	30.17	271	255240	unknown	Palmer JM et al., 2018	22	19		1	1	1	1	1			1			1	1	1	1				1	2	2		1				3
Ascomycota/Pezizomycotina/Leotiomycetes	Rhynchosporium commune	55.57	432	274555	260x	Penselin D et al., 2016	34	30		1	1	1	1	1	1		1			1	1	1		1			1	2	9		4			1	2
Ascomycota/Pezizomycotina/Leotiomycetes	Zalerion varium	55.61	108	1676298	100.84x	Mesny F et al., 2021	36	32		1	1	1	1	1			1			2	2	1					1	2	12		2				4
Ascomycota/Pezizomycotina/Orbiliomycetes	Arthrobotrys oligospora	40.07	309	unknown	36.6x	Yang J et al., 2011	20	20	1	1	1	1	1	1			1	2		1	1			1	1			3	2		1				1
Ascomycota/Pezizomycotina/Orbiliomycetes	Drechslerella stenobrocha	21.17	449	87472	unknown	Liu K et al., 2014	12	12	1				1	1				1		1		1						3	1		1				1
Ascomycota/Pezizomycotina/Orbiliomycetes	Monacrosporium haptotylum	39.53	1329	175558	28x	Meerupati T et al., 2013	17	16	1	1	1	1	1	1				1		1	1	1						2	1		1			1	1
Ascomycota/Pezizomycotina/Pezizomycetes	Ascobolus immersus	59.53	1225	171278	86.3	Murat C et al., 2018	19	17		1		1	1	1			1	1		1	1	1			1				6						1
Ascomycota/Pezizomycotina/Pezizomycetes	Morchella importuna	48.21	1793	958716	67.8x	Murat C et al., 2018	20	17		1	1	1	1	1			1			1	1	1					1	1	5						1
Ascomycota/Pezizomycotina/Pezizomycetes	Pyronema confluens	50.03	1865	709508	unknown	Traeger S et al., 2013	20	19		1	1	1	1	1	1		1	1		1	1	1			1		1	2	2		1				1
Ascomycota/Pezizomycotina/Pezizomycetes	Sphaerosporella brunnea	51.6	872	119241	907.91x	Benucci GMN et al., 2019	17	15		1	1	1	1	2	1		1			1	1	1			1		1		1						1
Ascomycota/Pezizomycotina/Pezizomycetes	Terfezia claveryi	74.47	1139	227193	79.23x	Miyauchi S et al., 2020	14	12		1	1	1	1	1	1		1			1	1	1							1						1
Ascomycota/Pezizomycotina/Pezizomycetes	Tuber indicum	110.49	3049	964338	240x	Morin E et al., 2021	16	14		1	1	1	1	1			1			1	1						1	1	3						1
Ascomycota/Pezizomycotina/Pezizomycetes	Tuber melanosporum	124.95	4040	63046	unknown	Martin F et al., 2010	15	14		1	1	1	1	1						1	1						1	2	3						1
Ascomycota/Pezizomycotina/Pezizomycetes	Wilcoxina mikolae	117.29	5591	65343	95.0x	Miyauchi S et al., 2020	15	14	1	1	1	1	1	1			1			1	1	1			1		1	1							1
Ascomycota/Pezizomycotina/Sordariomycetes	Beauveria bassiana	33.69	1226	84720	28x	Xiao G et al., 2012	21	21	1	1	1	1	1	1	1		1			1	3	1		2				2	2		1				1
Ascomycota/Pezizomycotina/Sordariomycetes	Chaetomium globosum	34.9	2453	50267	7x	Cuomo CA et al., 2015	24	22	1	1	1	1	1	1	1					1	1	1		1				3	7		1
Ascomycota/Pezizomycotina/Sordariomycetes	Clonostachys rosea	70.05	1527	3024965	150x	Karlsson M et al., 2015	22	20	1	1	1	1	1	1			1			1	2	1		1				2	3		1			1	1
Ascomycota/Pezizomycotina/Sordariomycetes	Colletotrichum fioriniae	49	1335	38339	49.7x	Baroncelli R et al., 2014	25	25		1	1	1	1	1	1		1			1	1	1						3	9		1			1	1
Ascomycota/Pezizomycotina/Sordariomycetes	Lecanicillium lecanii	35.59	160	782161	unknown	Shang Y et al., 2016	22	21	1	2	1	1	1	1	1		1			1	2	1		1				4	1		1				1
Ascomycota/Pezizomycotina/Sordariomycetes	Cordyceps militaris	32.27	597	108187	147x	Zheng P et al., 2011	19	18	1	1	1	1	1	1						1	2	1		1				3	2		1				1
Ascomycota/Pezizomycotina/Sordariomycetes	Cryphonectria parasitica	43.87	33	4041104	unknown	Crouch JA et al., 2020	28	22	1	1	2	1	1	1			1			1	1	1						2	5		1			1	2
Ascomycota/Pezizomycotina/Sordariomycetes	Drechmeria coniospora	32.83	36	4137327	unknown	Zhang L et al., 2016	15	15	1	1	1	1	1	1			1			1	2	1							2		1				1
Ascomycota/Pezizomycotina/Sordariomycetes	Fusarium graminearum	36.45	433	184591	unknown	Cuomo CA et al., 2007	19	19	1	1	1	1	1	1						1	1	1						3	4		1			1	1
Ascomycota/Pezizomycotina/Sordariomycetes	Fusarium oxysporum	47.91	488	538881	195x	DeIulio GA et al., 2018	25	24	1	1	3	2	1	1	1					1	1	1						3	4		2			1	1
Ascomycota/Pezizomycotina/Sordariomycetes	Hirsutella minnesotensis	51.06	1890	84252	128.3x	Lai Y et al., 2014	16	16	1	1	1	1	1	1			1			1	1	1		1				1	2		1				1
Ascomycota/Pezizomycotina/Sordariomycetes	Magnaporthiopsis poae	39.5	3106	16565	unknown	Okagaki LH et al., 2015	28	25	2	1	1	1	1	1						1	2	1						2	9		1				2
Ascomycota/Pezizomycotina/Sordariomycetes	Metarhizium acridum	39.42	1560	54747	107x	Gao Q et al., 2011	20	19	1	1	1	1	1	1						1	2	1		2				2	3		1				1
Ascomycota/Pezizomycotina/Sordariomycetes	Metarhizium anisopliae	38.5	188	6254943	unknown	Hu X et al., 2014	19	18	1	1	1	1	1	1			1			1	2	1	1	1				1	2		1				1
Ascomycota/Pezizomycotina/Sordariomycetes	Metarhizium robertsii	41.66	886	270873	147.33x	Hu X et al., 2014	18	17	1	1	1	1	1	1			1			1	2	1	1	1				1	1		1				1
Ascomycota/Pezizomycotina/Sordariomycetes	Plectosphaerella cucumerina	36.52	11	6487456	141.27x	Mesny F et al., 2021	25	25		1	1	1	1	1	1					1	1	1	1					4	9		1				1
Ascomycota/Pezizomycotina/Sordariomycetes	Pochonia chlamydosporia	44.22	84	1984628	211.0x	Wang G et al., 2016	18	18	1	1	1	1	1	1						1	2	1		1				2	3		1				1
Ascomycota/Pezizomycotina/Sordariomycetes	Pseudomassariella vexata	44.71	37	2561820	86.57x	Mondo SJ et al., 2017	28	26	1	1	1	1	1	1						1	2	1						2	11		1				2
Ascomycota/Pezizomycotina/Sordariomycetes	Purpureocillium lilacinum	38.53	508	150141	unknown	Wang G et al., 2016	15	15	1	1	1	1	1	1			1			1	2	1							2		1				1
Ascomycota/Pezizomycotina/Sordariomycetes	Thielavia terrestris	36.91	6	9477512	Finished	Berka RM et al., 2011	22	19	1	1	1	1	1	1						1	1	1	1					2	5		1				1
Ascomycota/Pezizomycotina/Sordariomycetes	Trichoderma atroviride	36.14	29	2007903	unknown	Kubicek CP et al., 2011	21	20	1	1		1	1	1			1			1	2	1		1				1	5		1				2
Ascomycota/Pezizomycotina/Sordariomycetes	Trichoderma reesei	33.4	128	797352	unknown	Martinez D et al., 2008	15	14	1	1	1	1	1	1						1	2	1		1							1				2
Ascomycota/Pezizomycotina/Sordariomycetes	Ustilaginoidea virens	33.57	139	6429791	unknown	Kumagai T et al., 2016	12	12	1	1			1	1			1			1	1	1							2		1				1
Ascomycota/Pezizomycotina/Sordariomycetes	Verticillium dahliae	33.83	1562	43309	7x	Klosterman SJ et al., 2011	18	17		1	1	1	1	1	1					1	1	1						1	5		1				1
Ascomycota/Pezizomycotina/Sordariomycetes	Neurospora crassa	41.68	8	656009	193.13x	Galagan JE, et al., 2003	20	16	1	1	1	1	1	1						1		1	1	1				2	3						1
Ascomycota/Pezizomycotina/Xylonomycetes	Trinosporium guianense	24.23	298	unknown	140.9x	unavailable	15	14		1	1	1	1	1			1			1	1	1			1		1			1	1				1
Ascomycota/Pezizomycotina/Xylonomycetes	Xylona heveae	24.34	56	360689	124.5x	Gazis R et al., 2016	14	13		1	1	1	1	1			1			1	1	1					1			1	1				1
Ascomycota/Saccharomycotina	Ashbya gossypii (Eremothecium gossypii)	9.1	7	1519140	4.2x	Dietrich FS et al., 2004	7	7				1		1											2	1						1		1
Ascomycota/Saccharomycotina	Candida dubliniensis	14.62	8	2267510	unknown	Jackson AP et al., 2009	9	7				1		1							1	1			1							1		1
Ascomycota/Saccharomycotina	Candida lusitaniae	12.11	88	266609	unknown	Butler G et al., 2009	7	6				1		1							1	1										1		1
Ascomycota/Saccharomycotina	Candida parapsilosis	13.03	9	unknown	unknown	Butler G et al., 2009	6	6				1		1							1	1										1		1
Ascomycota/Saccharomycotina	Candida tropicalis	14.61	7	221103	Unknown	Guin K et al., 2020	7	7				1		1							1	1			1							1		1
Ascomycota/Saccharomycotina	Kluyveromyces lactis	10.69	6	1753957	unknown	Dujon B et al., 2004	9	9	1			1		1							1	1			1	1						1		1
Ascomycota/Saccharomycotina	Lachancea thermotolerans	10.39	10	1513537	unknown	Souciet JL et al., 2009	7	8				1		1								1			2	1						1		1
Ascomycota/Saccharomycotina	Lodderomyces elongisporus	15.35	128	261145	unknown	Butler G et al., 2009	5	5				1		1							1	1												1
Ascomycota/Saccharomycotina	Pichia guilliermondii	10.61	71	313225	unknown	Butler G, et al.,2009	7	7				1		1							1	1										1		1	1
Ascomycota/Saccharomycotina	Pichia pastoris	9.22	5	2687137	unknown	De Schutteret al., 2009	6	4				1		1								1										1
Ascomycota/Saccharomycotina	Scheffersomyces stipitis	15.44	9	1803401	unknown	Jeffries TW, et al., 2007	6	6				1		1							1	1										1		1
Ascomycota/Saccharomycotina	Saccharomyces castellii	11.22	10	1245273	unknown	Gordon JL et al., 2011	7	7	1			1		1								1				1						1		1
Ascomycota/Saccharomycotina	Saccharomyces cerevisiae	12.18	17	924431	unknown	Foury F, et al., 1998	11	11	2			1		1							1	1			2	1						1		1
Ascomycota/Saccharomycotina	Lachancea kluyveri	11.54	37	1252455	unknown	Cliften P, et al. Science 2003 Jul 4	2	2																								1		1
Ascomycota/Saccharomycotina	Saccharomyces kudriavzevii	11.85	19	862329	unknown	Cliften P, et al. Science 2003 Jul 4	5	5	1			1														1						1		1
Ascomycota/Saccharomycotina	Saccharomyces mikatae	11.47	1648	20026	unknown	Kellis M, et al. Nature 2003 May 15	4	4	1																	1						1		1
Ascomycota/Saccharomycotina	Vanderwaltozyma polyspora	14.67	411	60946	unknown	Scannell DR et al., 2007	6	6	1			1		1								1			1							1
Ascomycota/Saccharomycotina	Yarrowia lipolytica	20.55	19	2069334	unknown	Kerscher S, et al.,2001	11	8	1			1		1						1		1			1							1			1
Ascomycota/Saccharomycotina	Zygosaccharomyces rouxii	9.76	9	1496342	181.58x	Jagtap SS et al., 2022	8	8	1			1		1								1			1	1						1		1
Ascomycota/Taphrinomycotina	Schizosaccharomyces cryophilus	11.56	202	290103	51x	Rhind N et al., 2011	10	10				1	1	1						1	1	1	1				1		1						1
Ascomycota/Taphrinomycotina	Schizosaccharomyces japonicus	11.73	87	1768158	9x	Rhind N et al., 2011	11	11	1			1	1	1						1	1	1	1		1		1		1
Ascomycota/Taphrinomycotina	Schizosaccharomyces octosporus	11.63	18	1777203	39x	Rhind N et al., 2011	10	10				1	1	1						1	1	1	1				1		1						1
Ascomycota/Taphrinomycotina	Schizosaccharomyces pombe	12.61	9	2923134	unknown	Wood V et al., 2002	14	12	1			1	1	1						1	1	1	1		1		1		1						1
Basidiomycota/Agaricomycotina/Agaricomycetes	Armillaria cepistipes	75.83	346	2288895	unknown	Sipos G et al., 2017	35	35		3		1	3	1						1	1	1			1	1	1		17			1		1	2
Basidiomycota/Agaricomycotina/Agaricomycetes	Armillaria gallica	85.34	1529	2159699	41.8x	Sipos G et al., 2017	39	38	1	2		1	4	1						1	1	1			1	1	1		19			1		1	2
Basidiomycota/Agaricomycotina/Agaricomycetes	Armillaria mellea	79.55	36822	unknown	57.25x	Collins C et al., 2013	24	24	1	2		1	2	1						1	1	1				1	1		10					1	1
Basidiomycota/Agaricomycotina/Agaricomycetes	Boletus edulis	69.19	478	420549	173.85x	Miyauchi S et al., 2020	18	17		2		1	2	1			1			1	1	1					1					1	1	1	3
Basidiomycota/Agaricomycotina/Agaricomycetes	Coprinopsis cinerea	36.19	68	3468139	unknown	Stajich JE, et al., 2010	43	43		3		2	3	2				1		2		2			1		2		16			2	2	2	3
Basidiomycota/Agaricomycotina/Agaricomycetes	Galerina marginata	59.42	1272	2607326	34.3x	Riley R et al., 2014	41	30		2		1	2	1			1	1		1	1	1					1		14			1		1	2
Basidiomycota/Agaricomycotina/Agaricomycetes	Hydnum rufescens	67.14	2013	72042	102x	Miyauchi S et al., 2020	15	15				1	2	1				1		2		1					1		3				1		2
Basidiomycota/Agaricomycotina/Agaricomycetes	Laccaria bicolor	60.71	584	71011	unknown	Martin F et al., 2008	35	29		1		1	2	1			1	1		1	1	1					1		13			1	1	1	2
Basidiomycota/Agaricomycotina/Agaricomycetes	Lentinula edodes	46.1	122	692557	61.0x	Park SG et al., 2017	19	19		2		1	2	1						1	1	1				1	1		4			1		1	2
Basidiomycota/Agaricomycotina/Agaricomycetes	Pholiota alnicola	75.01	976	213982	128.9x	Ruiz-Dueñas FJ et al., 2021	39	34	3	3		1	3	1			1	1		1	1	1					1		10			1	1	2	3
Basidiomycota/Agaricomycotina/Agaricomycetes	Pleurotus ostreatus	34.97	17	3500734	unknown	Riley R et al., 2014	25	22				1	2	1			1	1		1	1	1				1	1		5			1	1	1	3
Basidiomycota/Agaricomycotina/Agaricomycetes	Suillus tomentosus	53.06	203	520664	88.2x	Lofgren LA et al., 2021	15	15		1		1	2	1			1			1	1	1					1					1	1	1	2
Basidiomycota/Agaricomycotina/Agaricomycetes	Tricholoma matsutake	175.76	16714	18170	100.4x	Miyauchi S et al., 2020	27	21	1	2		1	2	1			1			1	1	1				1			4			1	1	1	2
Basidiomycota/Agaricomycotina/Dacrymycetes	Calocera cornea	33.24	1032	78250	85x	Nagy LG et al., 2016	27	26		1		1	3	1			1			1	1	1			1	1	1		7			1	1	1	3
Basidiomycota/Agaricomycotina/Dacrymycetes	Calocera viscosa	29.1	487	185910	81.7x	Nagy LG et al., 2016	24	23	1	1		1	1	1			1			1		1				1	1		7			1	1	1	3
Basidiomycota/Agaricomycotina/Dacrymycetes	Dacryopinax primogenitus	29.5	878	66431	43.19x	Floudas D et al., 2012	18	16		1		1	2	1			1			1		1				1	1		2			1	1		2
Basidiomycota/Agaricomycotina/Tremellomycetes	Cryptococcus gattii	17.65	98	1265488	109.0x	Farrer RA et al., 2015	11	11	1	1		1	1	1			1			1		1				1	1					1
Basidiomycota/Agaricomycotina/Tremellomycetes	Cryptococcus curvatus	19.91	73	197970	87.8x	Close D et al., 2016	14	12	1			1	1	1			1			1		1				1	1				1	1			1
Basidiomycota/Agaricomycotina/Tremellomycetes	Cryptococcus terricola	23.19	854	62162	84.3x	Close D et al., 2016	15	13	1			1	1	1			1			1		1			1	1	1							1	2
Basidiomycota/Agaricomycotina/Tremellomycetes	Naganishia vishniacii	19.68	76	687034	146.7x	Nizovoy P et al., 2021	12	10			1	1	1	1						1		1			1	1	1								1
Basidiomycota/Agaricomycotina/Tremellomycetes	Tremella mesenterica Fries	28.64	484	123767	unknown	Floudas D, et al., 2012	12	11				1	1	1						1		1				1	1	1	1			1			1
Basidiomycota/Agaricomycotina/Tremellomycetes	Trichosporon chiarellii	24.81	82	unknown	86.7x	unavailable	14	13	1			1		1			1			1		1			1	1	1		1		1	1			1
Basidiomycota/Agaricomycotina/Wallemiomycetes	Wallemia ichthyophaga	9.66	95	346931	280x	Zajc J et al., 2013	12	12				1	1	1						1	1	1				1	1	1	1					1	1
Basidiomycota/Agaricomycotina/Wallemiomycetes	Wallemia mellicola	9.82	114	255921	71x	Padamsee M et al., 2012	11	11				1		1						1		1			1	1	1	1	1					1	1
Basidiomycota/Pucciniomycotina	Leucosporidiella creatinivora	26.33	177	231415	unknown	Mondo SJ et al., 2017	18	18		1	1	1		1				1		1	1	1			1	1	1	3	3						1
Basidiomycota/Pucciniomycotina	Melampsora americana	112.35	389	1070030	128.49x	Crowell CR et al., 2022	22	21			1	2	2	1				1		1		1							10			1			1
Basidiomycota/Pucciniomycotina	Microbotryum intermedium	23.46	24	1672543	unknown	Branco S et al., 2017	14	14		1	1	1	1	1			1	1		1		1				1	1	1	1						1
Basidiomycota/Pucciniomycotina	Mixia osmundae	13.63	204	426173	150.9x	Toome M et al., 2014	17	13			1	1	1	1				1			1	1				1			2			1			2
Basidiomycota/Pucciniomycotina	Puccinia graminis f. sp. tritici	88.64	4557	39496	unknown	Duplessis S et al., 2011	28	28		1	1	1	3	1				2		1	2	1			1				12			1			1
Basidiomycota/Pucciniomycotina	Rhodotorula graminis strain	21.01	323	unknown	8.55x	Firrincieli A et al., 2015	21	21		1	1	1	1	1				1			1	1			1	1	1	4	5						1
Basidiomycota/Pucciniomycotina	Rhodosporidium toruloides	20.22	304	163970	unknown	Zhu Z, et al.,2012	21	21	1	1	1	1	1	1				1		1		1			1	1	1	5	3						1
Basidiomycota/Ustilaginomycotina	Ceraceosorus bombacis	26.09	5549	10305	210x	Sharma R et al., 2015	14	12	1			1	1	1				1		1		1				1	1	1				1			1
Basidiomycota/Ustilaginomycotina	Malassezia globosa	8.96	67	654612	unknown	Xu J et al., 2007	9	9	1			1		1						1		1				1	1	1							1
Basidiomycota/Ustilaginomycotina	Moesziomyces antarcticus	18.11	248	245824	unknown	Saika A et al., 2014	13	12			1	1	1	1				1		1		1				1	1	1				1			1
Basidiomycota/Ustilaginomycotina	Tilletiopsis washingtonensis	18.76	218	209942	84.7x	Kijpornyongpan T et al., 2018	14	14	1		1	1	1	1			1	1		1		1				1	1	1				1			1
Basidiomycota/Ustilaginomycotina	Ustilago maydis	19.66	253	129796	unknown	Kämper J et al., 2006	12	11	1		1	1	1	1						1		1					1	1				1			1
Blastocladiomycota	Allomyces macrogynus	57.06	8973	35497	11.39x	Amses KR et al., 2022	44	35	1	1	3	3	5	2			1	3	2	2	1	2			4								4		1
Blastocladiomycota	Blastocladiella britannica	19.08	1574	20944	139.1x	Amses KR et al., 2022	21	17		1		1	1	1			1	1	1	3	1	1			2								2		1
Blastocladiomycota	Catenaria anguillulae	41.34	509	217825	1.0x	Mondo SJ et al., 2017	22	16				2	2	1			1	1		2	1	1			2								1		2
Blastocladiomycota	Paraphysoderma sedebokerense	27.88	379	unknown	243.34	Amses KR et al., 2022	25	22		1	1	1	3	1				1	2	1					2			2					2		5
Chytridiomycota/Chytridiomycetes	Batrachochytrium salamandrivorans	32.64	5810	346311	unknown	Farrer RA et al., 2017	27	26			2	2	4	1				1		1	5				3	2									5
Chytridiomycota/Chytridiomycetes	Caulochytrium protostelioides	21.8	592	88443	128.4x	Ahrendt SR et al., 2018	10	9			1	1		1				1		1	1					1									2
Chytridiomycota/Chytridiomycetes	Gorgonomyces haynaldii	13.98	27	unknown	542.15x	Amses KR et al., 2022	23	18			1	1		1				1	5	1	1			1	2	1									3
Chytridiomycota/Chytridiomycetes	Homolaphlyctis polyrhiza	21.32	3928	5685	unknown	Joneson S et al., 2011	18	13			2	1					2	1		1	1			1	1	1							1		1
Chytridiomycota/Chytridiomycetes	Rhizoclosmatium globosum	57.02	437	292246	unknown	Mondo SJ et al., 2017	30	18			1	1	1	1			1	1		1	1			1				1	1						7
Chytridiomycota/Chytridiomycetes	Spizellomyces punctatus	24.13	329	155888	11.7x	Russ C et al., 2016	31	24		1	2	1	4	1		1	1	1	2	1	1				1	1							1		5
Chytridiomycota/Monoblepharidomycetes	Gonapodya prolifera	48.79	1154	63757	unknown	Chang Y et al., 2015	21	16			1	1	2	1		1	1			1	1				1								1		5
Chytridiomycota/Monoblepharidomycetes	Hyaloraphidium curvatum	31.93	55	722379	312.53x	Amses KR et al., 2022	33	17			1	1	2	1		1			2	1	1				1	1							1	1	3
Chytridiomycota/Neocallimastigomycetes	Anaeromyces robustus	71.69	1035	141798	20x	Haitjema CH et al., 2017	21	21			1	1	1	1		1			4	1					2	1							3		5
Chytridiomycota/Neocallimastigomycetes	Caecomyces churrovis	165.5	7737	unknown	88.81x	Brown JL et al., 2021	18	18			1	1	1	1					4	1					1	1							2		5
Chytridiomycota/Neocallimastigomycetes	Neocallimastix lanati	200.97	970	1031807	62.05x	Wilken SE et al., 2021	28	28			2	3	2	1					6	1					1	1							5		6
Chytridiomycota/Neocallimastigomycetes	Neocallimastix californiae	193.03	1819	443414	20x	Haitjema CH et al., 2017	23	23			2	2	2	1		1			4	1						1							4		5
Chytridiomycota/Neocallimastigomycetes	Pecoramyces sp. F1	106.83	16219	3373	unknown	Li Y et al., 2019	17	16			1	1	1	1		1			4							1							2		4
Chytridiomycota/Neocallimastigomycetes	Piromyces sp.	71.02	17217	2723	20x	Haitjema CH et al., 2017	15	15				1	1	1					4	1					1	1							1		4
Chytridiomycota/Neocallimastigomycetes	Piromyces sp. finn	56.46	232	749539	unknown	Haitjema CH et al., 2017	18	18			1	1	1	1		1			4	1					1	1							2		4
Mucoromycota/Glomeromycotina	Geosiphon pyriformis	128.32	2775	106416	unknown	Malar C M et al., 2021	17	15	1	1	1	1	3						2	1		1									2		1		1
Mucoromycota/Glomeromycotina	Gigaspora margarita	773.1	46230	29433	unknown	Venice F et al., 2020	32	31		1	2	1	6	1			1		2	6	5			1	1			1							3
Mucoromycota/Glomeromycotina	Gigaspora rosea	567.95	28997	36856	50x	Morin E et al., 2019	21	20		1	2	1	4	1			1		2	1	1			1	1			1							3
Mucoromycota/Glomeromycotina	Rhizophagus cerebriforme	136.89	14636	18126	unknown	Morin E et al., 2019	28	26	1	1	2	1	3	1		1	1		1	1	1	1		1	1			4			2		1		2
Mucoromycota/Glomeromycotina	Rhizophagus clarus	116.42	4984	1306809	unknown	Kobayashi Y et al., 2018	31	30	1	1	1	1	3	1		1	1		1	1	1	1		1	1			7			3		1		3
Mucoromycota/Glomeromycotina	Rhizophagus diaphanus	125.88	11501	14599	50x	Morin E et al., 2019	24	22		1	1	1	3	1		1	1		1	1	1	1		1	1			4			1		1		1
Mucoromycota/Glomeromycotina	Rhizophagus irregularis	138.3	21308	49632	unknown	Chen ECH et al., 2018	31	29		1	1	1	3	1		1	1		1	1	1	1		1	1			8			2		1		3
Mucoromycota/Mortierellomycotina	Dissophora decumbens	39.06	51	unknown	25.81x	unavailable	22	21	1		1	1	1	1		1	1			1	1	1			1	1	1		1			1	2		4
Mucoromycota/Mortierellomycotina	Dissophora ornata	38.94	2933	15359	144.3x	Chang Y et al., 2022	24	23	1		1	1	1	1		2	1	1		1	1	1			1	2	1		1			1	2		3
Mucoromycota/Mortierellomycotina	Lobosporangium transversale	42.77	138	672590	195.5x	Mondo SJ et al., 2017	23	21	1		1	1	1	1		1	1	2		1	1	1				1	1					1	2	1	3
Mucoromycota/Mortierellomycotina	Mortierella ambigua	39.11	32	33511	182.58x	Vandepol N, et al. Fungal Divers 2020 Sep	24	21	1		1	1	1	1		1	1	1		1	1	1			1	1	1					1	1	1	4
Mucoromycota/Mortierellomycotina	Mortierella alpina	37.62	69	2196674	158.4x	Vandepol N et al., 2020	27	24	1		1	1	1	1		2	1	2		1	1	1			1	1	1		1			1	2	1	3
Mucoromycota/Mortierellomycotina	Mortierella capitata	35.51	47	unknown	109.48x	unavailable	21	21	1		1	1	1	1		1	1	1		1	1	1			1	1	1					1	1	1	4
Mucoromycota/Mortierellomycotina	Mortierella elongata	49.86	742	1935744	112.8x	Uehling J et al., 2017	26	24			1	1	1	2		1	1	2		1	1	1			1	1	1		1			1	2	1	4
Mucoromycota/Mortierellomycotina	Mortierella gamsii	57.79	324	18338	104.75x	Vandepol N, et al. Fungal Divers 2020 Sep	24	21	1		1	1	1	2		1		2		1	1	1					1		1			1	2	1	3
Mucoromycota/Mortierellomycotina	Mortierella multidivaricata	37.67	217	12505	184.76x	Chang Y et al., 2022	21	21			1	1	1	1		1	1	2		1	1	1				2	1					1	2	1	3
Mucoromycota/Mortierellomycotina	Podila verticillata	41.85	700	100238	225.0x	unavailable	29	27	1		2	1	1	3		1	1	2		1	1	1			1	2	1					1	2	1	4
Mucoromycota/Mortierellomycotina	Mortierella wolfii	36.6	12	56063	141.96x	Vandepol N, et al. Fungal Divers 2020 Sep	21	21	1		1	1	1	1		1	1	1		1	1	1			1	1	1					1	1	1	4
Mucoromycota/Mucoromycotina	Hesseltinella vesiculosa	27.22	120	571097	71.0x	Mondo SJ et al., 2017	22	21	1		1	2	1	1			1	2		2	1	1			1		1					1		1	4
Mucoromycota/Mucoromycotina	Jimgerdemannia lactiflua	179.67	45525	5625	unknown	Chang Y et al., 2019	16	10	1		1		1			1					1												1		4
Mucoromycota/Mucoromycotina	Lichtheimia ramosa	30.71	85	3350511	unknown	Linde J et al., 2014	26	23	1		1	1	1	2		1		1		3	1	1			1	1	1					1	1	1	4
Mucoromycota/Mucoromycotina	Mucor ambiguus	40.74	8268	9387	unknown	Lebreton A et al., 2020	26	24	2		1	1	1	2			1	2		2	1	1			1	1	1					1	1	1	4
Mucoromycota/Mucoromycotina	Mucor circinelloides	36.35	1335	61543	unknown	Lee SC et al., 2014	24	23	2		1	1	1	3			1	2		2	1	1			1	1	1					1		1	3
Mucoromycota/Mucoromycotina	Mucor endophyticus	35	1573	unknown	unknown	Lebreton A et al., 2020	27	25	2		1	2	1	2			1	1		2	1	1			1	1	1					1	2	1	4
Mucoromycota/Mucoromycotina	Mucor fuscus	40.6	4065	unknown	unknown	Lebreton A et al., 2020	28	26	2		1	2	1	2			1	3		2	1	1			1	1	1					1	1	1	4
Mucoromycota/Mucoromycotina	Mucor lanceolatus	43.42	6264	unknown	unknown	Lebreton A et al., 2020	28	26	2		1	2	1	2			1	2		2	2	1			1	1	1					1	1	1	4
Mucoromycota/Mucoromycotina	Rhizopus microsporus var. microsporus	25.97	823	69381	143.6x	Mondo SJ et al., 2017	25	23	1		1	2	1	2		1	1	1		2	1	1			1	1	1					1		1	4
Mucoromycota/Mucoromycotina	Rhizopus delemar	46.1	389	303659	unknown	Ma LJ et al., 2009	25	23	2		1	2	1	3			1	1		3	1	1			1	1	1					1			3
Mucoromycota/Mucoromycotina	Saksenaea vasiformis	42.5	2417	79983	unknown	Chibucos MC et al., 2016	18	17	1		1	2	1	2		1	1				1	1					1					1	2	1	1
Zoopagomycota/Entomophthoromycotina	Basidiobolus meristosporus	89.49	1366	106019	unknown	Mondo SJ et al., 2017	18	16				1	2	1			1	2	3	2		1			1								1		1
Zoopagomycota/Entomophthoromycotina	Conidiobolus coronatus	39.9	7809	5199	16.31x	Chang Y et al., 2015	14	13				1	2	1		1	1	1		1	1				1	1									2
Zoopagomycota/Entomophthoromycotina	Conidiobolus thromboides	24.64	873	unknown	127.3x	Amses KR et al., 2022	12	10				1	2	1			1			1	1					1									2
Zoopagomycota/Entomophthoromycotina	Entomophaga maimaiga	1177.39	39	unknown	57.72x	unavailable	21	20	1			1	8	1		1	1			1	1					1									4
Zoopagomycota/Entomophthoromycotina	Zoophthora radicans	655.2	23379	unknown	67.4x	Amses KR et al., 2022	13	12				1	4	1		1	1			1						1									2
Zoopagomycota/kickxellomycotina	Coemansia reversa	21.84	1063	51001	38.24	Chang Y et al., 2015	13	13	1			1	2	1						1	1				1	1							1	1	2
Zoopagomycota/kickxellomycotina	Coemansia spiralis	18.93	34	unknown	505.95x	Chang Y et al., 2022	14	14	1			1	1	1		1				1	1				1		1					1	1	1	2
Zoopagomycota/kickxellomycotina	Linderina pennispora	26.2	227	908848	unknown	Mondo SJ et al., 2017	12	11				1	2	1		1					1						1						1	1	2
Zoopagomycota/kickxellomycotina	Smittium mucronatum	102.35	10612	16040	unknown	Wang Y et al., 2016	11	11	1			1	2			1	1									1							1		3
Zoopagomycota/kickxellomycotina	Zancudomyces culisetae	28.64	2298	22089	unknown	Wang Y et al., 2016	8	8				1	1							2							1								3
Zoopagomycota/Zoopagomycotina	Piptocephalis cylindrospora	10.75	1383	10824	unknown	Ahrendt SR et al., 2018	7	7	1				1					1	1		1														2
Zoopagomycota/Zoopagomycotina	Piptocephalis tieghemiana	18.55	264	unknown	145.4x	unavailable	12	12			1	1	3	1		1		1								1						1	1		1
Zoopagomycota/Zoopagomycotina	Syncephalis fuscata	29.36	371	unknown	276.18x	Amses KR et al., 2022	12	11			1	2	1	1				1			1					1	1						1		1
Zoopagomycota/Zoopagomycotina	Syncephalis plumigaleata	32.91	438	741312	143.79x	Chang Y et al., 2022	10	11	1		1	1	1	1				1								1	1						1		2
Zoopagomycota/Zoopagomycotina	Syncephalis pseudoplumigaleata	16.27	3496	5411	unknown	Ahrendt SR et al., 2018	10	8	1		1	1	1													1	1						1		1
Zoopagomycota/Zoopagomycotina	Thamnocephalis sphaerospora	18.2	1408	22678	unknown	Ahrendt SR et al., 2018	11	11	1		1	1	1	1			1				1						1						1		2
Cryptomycota	Paramicrosporidium saccamoebae	7.17	371	35016	unknown	Quandt CA et al., 2017	4	4	1			2	1
Cryptomycota	Rozella allomycis	11.86	1150	48693	unknown	James TY, et al. Curr Biol 2013 Aug 19	14	12	1	1		2	1	1				1		1	1	1			1										1
Microsporidia	Antonospora locustae	6.07	3116	183675	7.9x	Slamovits CH et al., 2004	2	2		1		1
Microsporidia	Encephalitozoon cuniculi	2.5	12	218329	Finished	Peyretaillade E et al., 2009	1	0
Microsporidia	Hepatospora eriocheir	4.57	1500	4304	unknown	Wiredu Boakye D et al., 2017	1	0
Microsporidia	Mitosporidium daphniae	5.64	612	32179	unknown	Haag KL et al., 2014	6	5	1			1	1	1																			1
Microsporidia	Nematocida displodere	3.07	99	238168	unknown	Luallen RJ et al., 2016	1	0
Microsporidia	Nematocida parisii	4.07	115	126036	45.0x	Cuomo CA et al., 2012	0	0
Microsporidia	Nosema apis	8.57	673	14029	unknown	Chen Yp et al., 2013	1	1		1
Microsporidia	Ordospora colligata	2.29	15	228601	unknown	Pombert JF et al., 2015	1	0
Microsporidia	Pseudoloma neurophilia	5.25	1603	6148	unknown	Ndikumana S et al., 2017	3	1		1
Microsporidia	Spraguea lophii	4.98	1392	98455	unknown	Campbell SE et al., 2013	3	0
Microsporidia	Trachipleistophora hominis	8.5	1596	9528	unknown	Heinz E et al., 2012	3	2		1		1
Microsporidia	Vavraia culicis subsp. floridensis	6.12	481	54534	unknown	Desjardins CA et al., 2015	3	2		1		1
Microsporidia	Vittaforma corneae	3.21	291	50887	unknown	Cuomo CA et al., 2012	2	0
